# Supplementary material
Source: Research Square preprint supplement (doi:10.21203/rs.3.rs-8407873/v1)
Supplement: Supplementary file 1 [file d15008f9fd4c0bc7220eb2de.docx]

**KNOWLEDGE, ATTITUDE, AND PRACTICE TOWARD EPIDEMIC CONJUNCTIVITIS AMONG SUDANESE PEOPLE, 2024: A CROSS-SECTIONAL STUDY**

You have the right to refuse to participate by checking “No” below.

**?Do you agree to participate in the study**

Yes

No

:

***Section 1: sociodemographic***

**Age in years ●**

.....................**......**

**Marital status ●**

Single

Divorced

Married

Widow

**Gender ●**

Male

Female

**Profession** ●

Employee / free lancer

Housewife

I don't have a job

Other than that

**Educational level** ●

Retreat/adult education

Education primary

Education secondary

University or post-university education

Uneducated

**(The household monthly income in numbers (in Sudanese pounds ●**

(Example: 250,000)

................................

**Does the approximate monthly household income coverb ●**

Just enough for the basics

Sufficient for all needs

Sufficient for needs and can be saved

Not enough

**Are you ●**

Internally displaced due to war

An externally displaced person (migrant) due to the war.l

In a war zone now

The war has not reached the area where I live

**Current location ●**

Outside Sudan

Khartoum State

Gezira State

Northern state

Blue Nile State

Red Sea State

Gedaref State

Kassala state

White Nile State

Sennar State

River Nile State

West Kordofan State

North Kordofan State

South Kordofan State

West Darfur State

North Darfur State

Central Darfur State

South Darfur State

East Darfur State

**Residency ●**

urban

rural

**Are you** ●

Student in the health field

Physician

Nurse

Pharmacist

Another health worker

I am not a health worker

**Did you get conjunctivitis this year ●**

Yes

No

**Did any of your relatives/acquaintances suffer from conjunctivitis this year●**

Yes

No

***Second section: General knowledge about conjunctivitis***

. **Have you heard of the disease called conjunctivitis ●**

Yes

No

**. What did you hear about it ●**

An infectious disease transmitted between people

Non-communicable disease

I don't know

**(Is conjunctivitis a contagious disease (transmitted from person to person●**

Yes

No

I don't know

**What causes a person to develop ophthalmia from the list below●**

| I don't know | No | Yes |  |
| --- | --- | --- | --- |
|  |  |  | Not keeping the eyes clean |
|  |  |  | Not maintaining hand hygiene |
|  |  |  | Not maintaining hand hygiene |
|  |  |  | Allergies |
|  |  |  | Contaminated contact lenses |
|  |  |  | Air and dust |
|  |  |  | Touching surfaces |
|  |  |  | Share eye makeup |
|  |  |  | Share eye drops |
|  |  |  | Share a towel or tissue |
|  |  |  | Touching or rubbing the eye |
|  |  |  | The crowd |
|  |  |  | Flies |
|  |  |  | Other insects |

**What are the main symptoms of conjunctivitis from the list** ●

| I don't know | No | Yes |  |
| --- | --- | --- | --- |
|  |  |  | Eye redness |
|  |  |  | Eye pain |
|  |  |  | Discharge from eye |
|  |  |  | Eye irritation |
|  |  |  | Sensitive to light |
|  |  |  | Blurred vision |
|  |  |  | Formation of pus in eye |
|  |  |  | Crust above the eyelashes |
|  |  |  | Eye inflammation |
|  |  |  | Joint pain |
|  |  |  | Headache |
|  |  |  | Runny nose |
|  |  |  | Anaroxia ( loss of appetite) |
|  |  |  | Fever |

**?Which of the following contributes to the prevention of conjunctivitis ●**

| I don't know | No | Yes |  |
| --- | --- | --- | --- |
|  |  |  | Hand hygiene |
|  |  |  | Clean eyes with soap and water |
|  |  |  | Keep your distance from people |
|  |  |  | Cover the mouth and nose while coughing and sneezing |
|  |  |  | Can conjunctivitis (conjunctivitis) go away without treatment |
|  |  |  | Are antibiotics used to treat bacterial conjunctivitis |
|  |  |  | A clean, warm, damp cloth placed on the eyes for 3-4 minutes daily provides relief. minutes daily provides |
|  |  |  | Can conjunctivitis pose a threat to sight, if it is not treated |

**Can conjunctivitis (conjunctivitis) go away without treatment ●**

Yes

No

I don't know

**Are antibiotics used to treat bacterial conjunctivitis ●**

Yes

No

I don't know

**. A clean, warm, damp cloth placed on the eyes for 3-4 minutes daily provides relief. minutes daily provides**

Yes

No

I don't know

**Can conjunctivitis pose a threat to sight, if it is not treated ●**

Yes

No

I don't know

**What is the source of your information about conjunctivitis ●**

Private reading from books, the Internet or newspapers

Television or radio

Social media

Family and friends

I don't have any information about conjunctivitis

.

***Section Three: Behavior***

**Is it important to go to a healthcare facility when experiencing symptoms of conjunctivitis**

Yes

No

I don't know

**How would you describe the risk of conjunctivitis to you** ●

Very dangerous

Somewhat dangerous

Not dangerous

**How effective are traditional treatments (such as herbs or natural materials) in treating conjunctivitis in your opinion**

Very effective

Moderately effective

Weakly effective

Not effective at all

**. What is your preferred treatment for conjunctivitis ●**

I prefer traditional treatments

( I prefer medical medications (such as 2 drop eye

I prefer using them together

**To what extent do you think the use of the following materials is effective in treating conjunctivitis? Mark each substance according to the effectiveness you think it has**

| Not effective at all | Weakly effective | Moderate effective | Very effective |  |
| --- | --- | --- | --- | --- |
|  |  |  |  | Tea ( compression or lotion) |
|  |  |  |  | Honey  apply it to the eye |
|  |  |  |  | Algard water  ( eye wash) |
|  |  |  |  | Sugar water ( eye wash |
|  |  |  |  | Salt water ( eye wash) |
|  |  |  |  | Basil seeds (boiled or washed) |
|  |  |  |  | Grape seed |
|  |  |  |  | Eyeliner |

***Section Four: Practice***

**Have you or someone you know ever used a traditional remedy to treat conjunctivitis**

Yes

No

**If your answer is yes, what is the traditional treatment used ●**

...............................

**How many times do you clean your hands during the day ●**

Often

Before and after eating

When getting out of the bathroom.l

When I suspect I have touched something strange

**Do you touch or rub your eyes with your hand ●**

Always

Often

Sometimes

Rarely

Never

**The last time you rubbed your eyes, did you wash your hands before doing so**

Yes

No

I don't remember

**Do you wipe your eyes or face with a tissue ●**

Yes

No

**Do you make sure the tissue is clean before wiping your eyes** ●

Always

Often

Sometimes

Rarely

Never

**How do you deal if you develop symptoms of conjunctivitis, God forbid●**

I'll be very careful

I'll be moderately careful

I'll be a little careful

I won't be careful
